# Supplementary material
Source: publisher site journal article supplement (https://www.dovepress.com/article/314971)
Supplement: Supplementary file 1 [file get_supplementary_file.php]

**Appendix 1. Search strategies**

**MEDLINE**

| **#** | **Searches** |
| --- | --- |
| 1 | Lumbar Vertebrae OR Lumbo* OR Lumbar OR Lumbopelvic OR Lumbosacral OR Sacrum OR Sacral OR Sacroiliac OR Back OR Coccyx OR Low back OR Lower back OR Trunk OR Torso OR iliac OR ilium OR Spine |
| 2 | Muscle OR Muscul* OR paraspinal OR Musculoskeletal OR Back Muscle OR back extensor OR Multifid* OR LM OR LMM OR Lumbar Multifidus |
| 3 | S1 and S2 |
| 4 | Pain OR agony |
| 5 | S1 AND S4 |
| 6 | Back pain OR Low back pain OR LBP OR Sciatica OR lumbago OR dorsalgia OR Lumbar pain OR Pelvic Pain OR lumbalgia OR backache* OR backache* OR Coccydynia |
| 7 | S5 OR S6 |
| 8 | Therap* OR Therapeutic OR Exercise* OR Treatment* OR Rehabilitation OR Treatment effects OR Treatment efficacy OR Conservative* OR non-surgical OR Intervention* OR stabilizing* OR spinal stabilization OR Core stabilization OR Physiotherapy OR Physical therapy OR Physical rehabilitation OR Muscle strengthening OR Electric stimulation OR muscle stimulation OR Resistance exercise* OR Motor control Training OR Motor control exercise |
| 9 | Randomized Controlled Trial* OR Randomised controlled trial* OR Randomization OR Randomized Controlled OR Random OR RCT OR Clinical trials |
| 10 | S3 AND S7 AND S8 AND S9 |

**Embase**

| **#** | **Searches** |
| --- | --- |
| 1 | 'lumbar vertebrae'/exp OR 'lumbar vertebrae' OR (lumbar AND vertebrae) OR lumbo* OR lumbar OR lumbopelvic OR lumbosacral OR 'sacrum'/exp OR sacrum OR sacral OR sacroiliac OR 'back'/exp OR back OR 'coccyx'/exp OR coccyx OR 'low back' OR (low AND ('back'/exp OR back)) OR 'lower back' OR (lower AND ('back'/exp OR back)) OR 'trunk'/exp OR trunk OR 'torso'/exp OR torso OR iliac OR 'ilium'/exp OR ilium OR 'spine'/exp OR spine |
| 2 | 'muscle'/exp OR muscle OR muscul* OR paraspinal OR musculoskeletal OR 'back muscle'/exp OR 'back muscle' OR (('back'/exp OR back) AND ('muscle'/exp OR muscle)) OR 'back extensor' OR (('back'/exp OR back) AND extensor) OR multifid* OR lm OR lmm OR 'lumbar multifidus'/exp OR 'lumbar multifidus' OR (lumbar AND multifidus) |
| 3 | #1 AND #2 |
| 4 | 'pain'/exp OR pain OR 'agony'/exp OR agony |
| 5 | #1 AND #4 |
| 6 | 'back pain'/exp OR 'back pain' OR (('back'/exp OR back) AND ('pain'/exp OR pain)) OR 'low back pain'/exp OR 'low back pain' OR (low AND ('back'/exp OR back) AND ('pain'/exp OR pain)) OR lbp OR 'sciatica'/exp OR sciatica OR 'lumbago'/exp OR lumbago OR 'dorsalgia'/exp OR dorsalgia OR 'lumbar pain'/exp OR 'lumbar pain' OR (lumbar AND ('pain'/exp OR pain)) OR 'pelvic pain'/exp OR 'pelvic pain' OR (('pelvic'/exp OR pelvic) AND ('pain'/exp OR pain)) OR 'lumbalgia'/exp OR lumbalgia OR backache* OR 'coccydynia'/exp OR coccydynia |
| 7 | #5 OR #6 |
| 8 | (therap* OR therapeutic OR exercise* OR treatment* OR 'rehabilitation'/exp OR rehabilitation OR 'treatment effects' OR (('treatment'/exp OR treatment) AND effects) OR 'treatment efficacy'/exp OR 'treatment efficacy' OR (('treatment'/exp OR treatment) AND ('efficacy'/exp OR efficacy)) OR conservative* OR 'nonsurgical' OR intervention* OR stabilizing* OR 'spinal stabilization'/exp OR 'spinal stabilization' OR (spinal AND ('stabilization'/exp OR stabilization)) OR 'core stabilization' OR (core AND ('stabilization'/exp OR stabilization)) OR 'physiotherapy'/exp OR physiotherapy OR 'physical therapy'/exp OR 'physical therapy' OR (physical AND ('therapy'/exp OR therapy)) OR 'physical rehabilitation'/exp OR 'physical rehabilitation' OR (physical AND ('rehabilitation'/exp OR rehabilitation)) OR 'muscle strengthening'/exp OR 'muscle strengthening' OR (('muscle'/exp OR muscle) AND strengthening) OR 'electric stimulation'/exp OR 'electric stimulation' OR (electric AND ('stimulation'/exp OR stimulation)) OR 'muscle stimulation'/exp OR 'muscle stimulation' OR (('muscle'/exp OR muscle) AND ('stimulation'/exp OR stimulation)) OR 'resistance'/exp OR resistance) AND exercise* OR 'motor control training' OR (('motor'/exp OR motor) AND ('control'/exp OR control) AND ('training'/exp OR training)) OR 'motor control exercise' OR (('motor'/exp OR motor) AND ('control'/exp OR control) AND ('exercise'/exp OR exercise)) |
| 9 | randomized AND controlled AND trial* OR 'randomised controlled' OR (randomised AND controlled AND trial*) OR 'randomization'/exp OR randomization OR 'randomized controlled'OR (randomized AND controlled) OR random OR rct OR 'clinical trials'/exp OR 'clinical trials' OR (('clinical'/exp OR clinical) AND trials) |
| 10 | #3 AND #7 AND #8 AND #9 |

**SPORTDiscus**

| **#** | **Searches** |
| --- | --- |
| 1 | Lumbar Vertebrae OR Lumbo* OR Lumbar OR Lumbopelvic OR Lumbosacral OR Sacrum OR Sacral OR Sacroiliac OR Back OR Coccyx OR Low back OR Lower back OR Trunk OR Torso OR iliac OR ilium OR Spine |
| 2 | Muscle OR Muscul* OR paraspinal OR Musculoskeletal OR Back Muscle OR back extensor OR Multifid* OR LM OR LMM OR Lumbar Multifidus |
| 3 | S1 and S2 |
| 4 | Pain OR agony |
| 5 | S1 AND S4 |
| 6 | Back pain OR Low back pain OR LBP OR Sciatica OR lumbago OR dorsalgia OR Lumbar pain OR Pelvic Pain OR lumbalgia OR backache* OR backache* OR Coccydynia |
| 7 | S5 OR S6 |
| 8 | Therap* OR Therapeutic OR Exercise* OR Treatment* OR Rehabilitation OR Treatment effects OR Treatment efficacy OR Conservative* OR non-surgical OR Intervention* OR stabilizing* OR spinal stabilization OR Core stabilization OR Physiotherapy OR Physical therapy OR Physical rehabilitation OR Muscle strengthening OR Electric stimulation OR muscle stimulation OR Resistance exercise* OR Motor control Training OR Motor control exercise |
| 9 | Randomized Controlled Trial* OR Randomised controlled trial* OR Randomization OR Randomized Controlled OR Random OR RCT OR Clinical trials |
| 10 | S3 AND S7 AND S8 AND S9 |

**CINAHL**

| **#** | **Searches** |
| --- | --- |
| 1 | Lumbar Vertebrae OR Lumbo* OR Lumbar OR Lumbopelvic OR Lumbosacral OR Sacrum OR Sacral OR Sacroiliac OR Back OR Coccyx OR Low back OR Lower back OR Trunk OR Torso OR iliac OR ilium OR Spine |
| 2 | Muscle OR Muscul* OR paraspinal OR Musculoskeletal OR Back Muscle OR back extensor OR Multifid* OR LM OR LMM OR Lumbar Multifidus |
| 3 | S1 and S2 |
| 4 | Pain OR agony |
| 5 | S1 AND S4 |
| 6 | Back pain OR Low back pain OR LBP OR Sciatica OR lumbago OR dorsalgia OR Lumbar pain OR Pelvic Pain OR lumbalgia OR backache* OR backache* OR Coccydynia |
| 7 | S5 OR S6 |
| 8 | Therap* OR Therapeutic OR Exercise* OR Treatment* OR Rehabilitation OR Treatment effects OR Treatment efficacy OR Conservative* OR non-surgical OR Intervention* OR stabilizing* OR spinal stabilization OR Core stabilization OR Physiotherapy OR Physical therapy OR Physical rehabilitation OR Muscle strengthening OR Electric stimulation OR muscle stimulation OR Resistance exercise* OR Motor control Training OR Motor control exercise |
| 9 | Randomized Controlled Trial* OR Randomised controlled trial* OR Randomization OR Randomized Controlled OR Random OR RCT OR Clinical trials |
| 10 | S3 AND S7 AND S8 AND S9 |

Other search strategies for PEDro and Cochrane Library:

(Lumbar spine OR sacro-iliac joint OR pelvis OR low back pain OR lower back pain OR backache OR LBP OR lumbar multifidus OR LM OR treatment OR motor control training OR exercise OR Stabilisation OR stabilization OR stimulation OR RCT OR randomized controlled trial OR randomised controlled trial OR clinical trial).

**Appendix 2. Measurement methods for various morphological parameters of lumbar multifidus muscle**

| **Category** | **Definition** | **Measurement methods** |
| --- | --- | --- |
| Resting lumbar  Multifidus  thickness | The distance between the thoracolumbar fascia and the facet joint at rest63 | Ultrasonography |
| Contracted  lumbar multifidus  thickness | The distance between the thoracolumbar fascia and  the facet joint during multifidus contraction when  the participant is performing a contralateral arm lift  maneuver63 | Ultrasonography |
| Contracted  Multifidus  thickness with  resistance | The distance between the thoracolumbar fascia and  the facet joint during contraction, when the  participant is performing a contralateral arm lift  maneuver by holding a weight29,63 | Ultrasonography |
| Percent thickness  change during  multifidus  contraction | Thickness change = (Contracted thickness – resting  thickness)/Resting thickness x 10064 | Ultrasonography |
| Cross-sectional  area of multifidus | The cross-sectional area of lumbar multifidus at a  target vertebral level is measured from a transverse  ultrasound image,26 or  The cross-sectional area is measured from a trans-axial view of CT image. The outlines of the multifidus is identified by a cursor on the computer screen at different lumbar levels.31 | Ultrasonography  or computerized  tomography |
| Fatty infiltration  of multifidus | Hyperintense regions within the multifidus muscle  observed on T2 axial view of MR images is  considered as fatty infiltration/replacement of  multifidus muscle tissue by fat.16 Fatty  infiltration of multifidus muscle is determined by the  difference between the total cross-sectional area and  functional cross-sectional area (lean muscle  mass/the area of muscle which is free from fat).65,66  Low-density regions within the multifidus muscle  observed on trans-axial view of CT image is  considered as fatty infiltration of multifidus muscle.67  Trans-axial CT images are used to estimate the  mean density of multifidus muscle which is  measured in Hounsfield unit.68 | Magnetic  Resonance  Imaging or  Computerized  tomography |
| Total volume of lumbar multifidus | A software is used to trace around the multifidus muscle on both  right and left side on a T2 axial view and the muscle area is  calculated.  Total volume of lumbar multifidus from 1st to 5th vertebral level is  calculated.49 | Magnetic  Resonance  Imaging or  Computerized  tomography |

**Appendix 3. Reasons for excluding studies.**

| **Reasons for exclusion** | **Excluded studies.** |
| --- | --- |
| Healthy participants | Belavy et al 2010,69 Belavy et al 2008,70 Hides et al 2012,71 Holt et al  2016,72 Rostami et al 2014,73 Herbert, Heiss, and Basso, 200874 |
| Healthy controls | Lariviere et al 2018,75 Kliziene et al 2015,76 Zhang et al 201877 |
| Ineligible study  design/intervention | Huang et al 2013,27 Huang et al 2014,28 Azadinia et al 2019,63 Longo et al 2016,78  Minetto et al 2018,79 Chung et al 2013,25 Danneels et al 2001,31 Sipaviciene et al 2018,26  Sokunbi et al 200852 |
| Ineligible outcome  measures | Jackson, Shepherd, and Kell 2011,80 Jeong at al 2015,81 Ko et al  2018,82 Mayer et al 2016,83 Smith et al 2011,84 Alrwaily 2017,85  Storheim et al 200386 |
| Thesis | Sions, 2012.87 |
| Conference  proceedings | Thomas. A, 2015,88 Barut, Tastaban, and Sendu 201889 |
| Poster Presentation | Vincent et al 201490 |
| Other than English | Mannion et al 2001,91 Dalichau et al 200592 |

**Appendix 4: Details of various physiotherapy treatments in the included studies**

| **Publications** | **Types of treatment** | **Details** |
| --- | --- | --- |
| **MOTOR CONTROL EXERCISE** | | |
| Akbari et al, 200830 | MCE | At the first stage, exercises causing low-load activation of the stabilizing muscles (transversus abdominis and lumbar multifidus) introduced in supine, sitting, standing and 4-point kneeling positions). Participants were taught to contract these stabilizing muscles. Gradually, the holding time of these muscles was increased to the extent where participants were able to perform 10 contractions with a 10-second hold. Accordingly, the dynamic exercises were introduced at the second stage. The activation of transversus abdominis and LMM was ensured by observing the drawing-in maneuver of lower abdomen and bulging of LMM under therapist’s finger placed on spinous process of L4-L5, respectively.  MCE were specified for each stage. |
| Berglund et al, 201724 | MCE | The exercises were tailor-made for individual participants’ impairment and muscle activation pattern. Initially, the exercises were targeted to maintain the lumbar spine in neutral position in supine, sitting, four-point kneeling, and standing. Later, they learned to control movements in their lumbar spine with minimal efforts while moving their arms or legs in similar positions. Finally, the difficulty level of exercises was increased by introducing various activities which caused dynamic movements of the lumbar spine. |
| Hides et al, 199645 | MCE | In standing position, participants performed an active, isometric LMM contraction with the lumbar spine in neutral position. |
| Hosseinifar et al, 201329 | MCE | The MCE was performed in 6 steps:  Exercise 1 - MCE with focus on training isolated contraction of the TrA, LMM, and pelvic floor muscles.  Exercise 2 - MCE with focus on co-contractions of the TrA, LMM, and pelvic floor muscles in the prone, supine, and 4-point kneeling positions.  Exercise 3 - closed kinematic chain SCE.  Exercise 4 - MCE with low load by adding leverage of the limbs during open chain exercises; Exercise 5- MCE in functional activities.  Exercise 6- co-contraction of the TrA and LMM muscles with an external load, complex movements, increased loading to the lumbar spine in neutral position, co-contraction of TrA and LMM during light aerobic activities such as walking, and activities that aggravate the symptoms |
| Kehinde et al, 201446 | MCE | Details of exercise were not reported. |
| Kim and Kim, 201347 | MCE using sling | MCE using sling –  1st week - In prone, MCE and in supine position bridging exercise were introduced.  2nd & 3rd week - In prone, MCE and in supine position bridging, pelvic lift and hip abduction exercises was introduced.  4 to 6 weeks - In prone, MCE and in supine position bridging, pelvic lift, and hip abduction. In side-lying position hip abduction and adduction. |
| Nabavi et al, 20182 | MCE | Exercises were represented through images in the article and details were not provided |
| **Motor control exercise on a gymnastic ball** | | |
| Lee et al, 201148 | MCE on a gymnastic ball | Warm-up for 5 mins: stretching.  Exercises on the ball for 30-35 mins: push-up, alternate superman pose, roll out, side crunch, bridging, reverse bridging, crunch-legs elevated, sit up, back extension, alternate arm-leg extension.  Cool-down for 5 mins: stretching |
| **MOTOR CONTROL EXERCISE WITH OTHER INTERVENTIONS** | | |
| Kehinde et al, 201446 | MCE + TENS  MCE +  massage | Details of interventions were not provided |
| Kim and Kim, 201347 | MCE using sling+ Push-ups | MCE in Quadrupedal position during 1-week, MCE in prone position for weeks 2-3, MCE in standing position for weeks 4-6. Details of the exercises were not provided |
| Tagliaferri et al, 202049 | MCE + manual therapy | MCE which caused activation of TrA, LMM and pelvic floor muscles were performed in non-weight bearing activities. MCE were performed in functional activities (e.g., walking) if it was a part of participants goals. Depending on the level of pain, exercises were progressed.  Manual therapy: Spinal manipulations were provided in antero-posterior and transverse direction to mobilize lumbar spine along with cognitive-behavioural education |
| **General Physiotherapy** | | |
| Kim and Kim, 201347 | GPT | Hot pack application (80ºC) for 10 mins, intermittent/continuous traction (2,000-2,500Hz) for  15 mins and US (0.8-1MHz) for 5 mins. |
| Lee et al, 201148 | GPT | Moist heat treatment (20-25mins), US (5 mins, 1.5W/cm2) and TENS (20 mins at 4Hz) and strength of recognizable muscle contraction. |
| Nabavi et al, 20182 | GPT | Warmup exercises, routine exercises, 5 mins of therapeutic US, 15 mins of continuous TENS, and infrared radiation |
| **General exercises** | | |
| Akbari et al, 200830 | GE | Exercises that would activate paravertebral and abdominal muscles. |
| **Other interventions** | | |
| Berglund et al, 201724 | High load lifting | Participants were instructed to maintain a neutral position of the low back and activate the lumbar stabilizing muscles during lifting and lowering the barbell from the floor. First few sessions were aimed at starting a proper technique at 3 to 5 sets of 10 repetitions with low loads (10-20 kg).  Progression was done by increasing the number of 5 - 8 sets per session while the repetitions were reduced to 3 to 5 per set with increased weight on the bar. |
| Hides et al,199645 | Drugs | Analgesics aspirin, paracetamol (8 mg codeine tablets), combinations of low doses of codeine and aspirin (8 tablets per day), non-steroidal anti-inflammatory drugs (Digesic and Capadex) and Valium |
| Hosseinifar et al, 201329 | McKenzie | Six exercises were performed: In prone, four extension-type exercises were performed and standing, while two flexion-type exercises were performed in supine and sitting. Participants needed to maintain at the end position of each exercise for 10 seconds |
| Kehinde et al, 201446 | Drugs | Analgesics (details of drugs were not provided) |
| Tagliaferri et al, 2020 49 | GSA | Aerobic exercise: (running/walking on a treadmill- 65%-85% of HR max for 20 mins)  Strengthening exercises: Exercises like squatting, deadlifts, push-ups, trunk flexion and extension |

Abbreviations: ADLs, activities of daily living; C, Celsius; exs, exercise; GE, general exercises; Gp, group; GPT, general physiotherapy; GSA, general strengthening and aerobic exercises; LMM, lumbar multifidus muscle; MCE, motor control exercise; mins, minutes; TENS, transcutaneous electrical nerve stimulation; TrA, transversus abdominis; US, therapeutic ultrasound therapy

**Appendix 5. Summary of Findings and Quality of Evidence Assessment**

| Quality assessment | | | | | | Quality |
| --- | --- | --- | --- | --- | --- | --- |
| No of studies | **Study design** | **Risk of bias** | **Inconsistency** | **Indirectness** | **Imprecision** |  |
| *Volume* |  |  |  |  |  |  |
| 1 | RCT | serious a | not serious | not serious | serious b | ⨁⨁◯◯ LOW |
| *Cross-sectional area* | | | | | | |
| MCE + drugs vs Drugs only | | | | | | |
| 1 | RCT | serious a | not serious | not serious | serious b | ⨁⨁◯◯ LOW |
| GPT vs MCE using sling + GPT vs MCE using sling + GPT + pushups | | | | | | |
| 1 | RCT | very serious a | not serious | not serious | serious b | ⨁◯◯◯  VERY LOW |
| MCE on a gymnastic ball vs GPT | | | | | | |
| 1 | RCT | very serious a | not serious | not serious | serious b | ⨁◯◯◯ VERY LOW |
| MCE + GPT vs GE + GPT | | | | | |  |
| 1 | RCT | serious a | not serious | not serious | serious b | ⨁⨁◯◯ LOW |
| MCE + manual therapy vs GSA | | | | | | |
| 1 | RCT | serious a | not serious | not serious | serious b | ⨁⨁◯◯ LOW |
| *Resting thickness* | | | | | | |
| MCE vs GE | | | | | | |
| 1 | RCT | serious a | not serious | not serious | serious b | ⨁⨁◯◯ LOW |
| MCE vs HLL | | | | | | |
| 1 | RCT | serious a | not serious | not serious | serious b | ⨁⨁◯◯ LOW |
| MCE vs McKenzie exercise | | | | | | |
| 1 | RCT | serious a | not serious | not serious | serious b | ⨁⨁◯◯ LOW |
| MCE + GPT vs GE + GPT | | | | | | |
| 1 | RCT | serious a | not serious | not serious | serious b | ⨁⨁◯◯ LOW |
| *Contracted Thickness* | | | | | | |
| MCE vs McKenzie exercise | | | | | | |
| 1 | RCT | serious a | not serious | not serious | serious b | ⨁⨁◯◯ LOW |
| MCE vs MCE + TENS vs MCE + massage vs analgesics | | | | | | |
| 1 | RCT | serious a | not serious | not serious | serious b | ⨁⨁◯◯ LOW |
| *Pain* | | | | | | |
| MCE vs GE | | | | | | |
| 1 | RCT | serious a | not serious | not serious | serious b | ⨁⨁◯◯  LOW |
| MCE vs HLL | | | | | | |
| 1 | RCT | serious a | not serious | not serious | serious b | ⨁⨁◯◯ LOW |
| MCE vs McKenzie exercise | | | | | | |
| 1 | RCT | serious a | not serious | not serious | serious b | ⨁⨁◯◯  LOW |
| MCE + drugs vs Drugs only | | | | | | |
| 1 | RCT | serious a | not serious | not serious | serious b | ⨁⨁◯◯ LOW |
| MCE on a gymnastic ball vs GPT | | | | | | |
| 1 | RCT | very serious a | not serious | not serious | serious b | ⨁◯◯◯ VERY LOW |
| MCE + GPT vs GE + GPT | | | | | | |
| 1 | RCT | serious a | not serious | not serious | serious b | ⨁⨁◯◯ LOW |
| MCE + manual therapy vs GSA | | | | | | |
| 1 | RCT | serious a | not serious | not serious | serious b | ⨁⨁◯◯ LOW |

Explanations:

The Risk of Bias among included studies was assessed using the Cochrane collaboration's Tool (RoB 2.0) which included 5 domains of potential bias: Randomization, deviations from intended interventions, missing outcome data, measurement of the outcome, and selective reporting.

a. The quality of evidence was downgraded if:

- There was a 'high' risk of bias in any domain (by one level)
- There was a 'high' risk of bias in half or more of the domains (by two levels)

Note: The risk of bias in all studies was evaluated using the using the Cochrane collaboration RoB Tool (RoB 2.0).

The quality of evidence was downgraded by one level if:

b. There was only one study.
